# Supplementary figures and images for: Dicarboxylate anion-dependent assembly of Ni(II) coordination polymers with 4,4′-dipyridyl sulfide
Source: Royal Society of Chemistry journal article supplement (doi:10.1039/b815916e), 2009-01-01

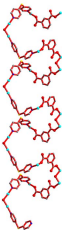

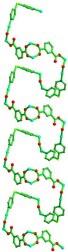

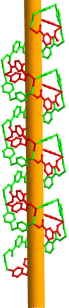

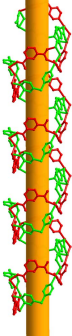

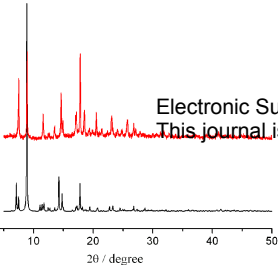

Supplement: b815916e.pdf [file b815916e.pdf]
